1 **Full title:** *In vitro* and *in vivo* venom-inhibition assays identify metalloproteinase-inhibiting drugs as  
2 potential treatments for snakebite envenoming by *Dispholidus typus*

3

4 **Short title:** SVMMP inhibitors for treatment of *Dispholidus typus* envenoming

5

6 **Keywords:** Small molecules; drugs; Boomslang; snakebite; SVMMP

7

8 **Authors:** Stefanie K. Menzies<sup>1,2</sup>, Rachel H. Clare<sup>1,2</sup>, Chunfang Xie<sup>3#</sup>, Adam Westhorpe<sup>1,2</sup>, Steven R.

9 Hall<sup>1,2</sup>, Rebecca J. Edge<sup>1,2</sup>, Jaffer Alsolaiss<sup>1,2</sup>, Edouard Crittenden<sup>1,2</sup>, Robert A Harrison<sup>1,2</sup>, Jeroen Kool<sup>3</sup>,

10 Nicholas R. Casewell<sup>1,2\*</sup>

11 [\\*.Nicholas.Casewell@liverpool.ac.uk](mailto:*.Nicholas.Casewell@liverpool.ac.uk)

12

13 Affiliations:

14 <sup>1</sup> Centre for Snakebite Research and Interventions, Department of Tropical Disease Biology, Liverpool

15 School of Tropical Medicine, Pembroke Place, Liverpool, UK L3 5QA

16 <sup>2</sup> Centre for Drugs and Diagnostics, Department of Tropical Disease Biology, Liverpool School of

17 Tropical Medicine, Pembroke Place, Liverpool, UK L3 5QA

18 <sup>3</sup> Amsterdam Institute of Molecular and Life Sciences, Division of BioAnalytical Chemistry, Department

19 of Chemistry and Pharmaceutical Sciences, Faculty of Science, Vrije Universiteit Amsterdam, De

20 Boelelaan 1085, 1081HV Amsterdam, The Netherlands

21 #Present Address: Department of Chemical Engineering, Nanchang University, Nanchang 330031,

22 China

23

24 Author contributions:

25 Conceptualization – JK, NRC

26 Methodology – SKM, RHC, CX

27 Investigation – SKM, RHC, CX, AW, SRH, RJE, JA, EC, RAH, NRC,

28 Data curation – SKM, RHC, CX, AW

29 Formal analysis – SKM, RHC, CX, AW

30 Original draft preparation – SKM, RHC, CX, NRC, JK

31 Editing - all authors

32

### 33 **Abstract**

34 Snakebite envenoming affects more than 250,000 people annually in sub-Saharan Africa. Envenoming  
35 by *Dispholidus typus* (boomslang) results in venom induced consumption coagulopathy, whereby  
36 highly abundant prothrombin-activating snake venom metalloproteinases (SVMPs) consume clotting  
37 factors and deplete fibrinogen. The only available treatment for *D. typus* envenoming is the  
38 monovalent SAIMR Boomslang antivenom. Treatment options are urgently required because this  
39 antivenom is often difficult to source and, at \$6,000/vial, typically unaffordable for most snakebite  
40 patients. We therefore investigated the *in vitro* and *in vivo* preclinical efficacy of four SVMP inhibitors  
41 to neutralise the effects of *D. typus* venom; the matrix metalloproteinase inhibitors marimastat and  
42 prinomastat, and the metal chelators dimercaprol and DMPS. The venom of *D. typus* exhibited an  
43 SVMP-driven procoagulant phenotype *in vitro*. Marimastat and prinomastat demonstrated  
44 equipotent inhibition of the SVMP-mediated procoagulant activity of the venom *in vitro*, whereas  
45 dimercaprol and DMPS showed considerably lower potency. However, when tested in preclinical  
46 murine models of envenomation, DMPS and marimastat demonstrated partial protection against  
47 venom lethality, demonstrated by prolonged survival times of experimental animals, whereas  
48 dimercaprol and prinomastat failed to confer any protection at the doses tested. The results  
49 presented here demonstrate that DMPS and marimastat show potential as novel small molecule-  
50 based therapeutics for *D. typus* snakebite envenomation. These two drugs have been previously  
51 shown to be effective against *Echis ocellatus* venom induced consumption coagulopathy (VICC) in

52 preclinical models, and thus we conclude that marimastat and DMPS may be valuable early  
53 intervention therapeutics to broadly treat VICC following snakebite envenoming in sub-Saharan Africa.

54

## 55 **1. Introduction**

56 More than 250,000 cases of snakebite envenoming are estimated to occur annually in sub-Saharan  
57 Africa<sup>1</sup>, disproportionately affecting those in rural, impoverished communities without adequate  
58 access to healthcare<sup>2,3</sup>. Venom-induced consumption coagulopathy (VICC) is a common manifestation  
59 of snakebite envenoming, during which procoagulant venom toxins consume clotting factors resulting  
60 in the ensuing depletion of fibrinogen and, ultimately, coagulopathy<sup>4</sup>. Several clotting factors are the  
61 target for procoagulant snake venom toxins, and these include Factor X, Factor V, fibrinogen and  
62 prothrombin<sup>4</sup>. While infrequent, envenomings by the rear fanged African colubrid *Dispholidus typus*  
63 (boomslang) are characterised by causing VICC<sup>5-7</sup>. The venom of this species is known to potently  
64 activate prothrombin<sup>8</sup>, resulting in the liberation of thrombin, and the subsequent downstream  
65 consumption of fibrinogen and fibrin, causing dysregulation of coagulation<sup>8-10</sup>. The activation of  
66 prothrombin is likely the result of snake venom metalloproteinases (SVMs)<sup>9,10</sup>, which are the  
67 dominant toxin type present in the venom and account for almost 75% of the proteinaceous toxins<sup>11,12</sup>.  
68 Other minor toxin families identified in the *D. typus* venom proteome include three-finger toxins,  
69 phospholipases A2 (PLA<sub>2</sub>s), cysteine-rich secretory proteins (CRISPs), snake venom serine proteases  
70 and C-type lectin-like toxins (of which each constitute <10% of the venom proteome)<sup>11</sup>, though their  
71 contribution to envenoming pathology remains unclear.

72 *Dispholidus typus* is broadly distributed throughout much of sub-Saharan Africa (sSA) and whilst  
73 incidences of envenoming are fortunately rare, the rapid and severe VICC consequences pose  
74 considerable clinical challenges. This is because the only specific treatment for *D. typus* envenoming  
75 is the monospecific F(ab')<sub>2</sub> antivenom "SAIMR Boomslang" (South African Vaccine Producers Pty Ltd),  
76 which has limited availability outside of the Southern Africa Economic Community, and costs as much  
77 as US\$6050 per vial<sup>13</sup>. Given that *D. typus* exhibits a broad geographical distribution throughout much

78 of sub-Saharan Africa (sSA), the only specific for treatment for envenomings caused by this species is  
79 largely unobtainable for snakebite victims who either cannot afford, or do not have access to, the  
80 antivenom<sup>9</sup>, and thus investigating novel treatments is a research priority.

81 More generally, it is well recognised that conventional polyclonal antibody-based antivenoms have  
82 several shortcomings, despite being life-saving therapeutics. In addition to often being unaffordable  
83 to many snakebite victims, they are associated with high rates of adverse reactions<sup>14,15</sup>, and have poor  
84 dose efficacy, with only ~10-20% of the active immunoglobulins recognising and binding to venom  
85 toxins<sup>16</sup>. Logistically, antivenoms are poorly suited for the rural locations in which they are typically  
86 required; for example many antivenoms rely on cold chain transport and storage and must be  
87 administered intravenously by trained staff in healthcare facilities<sup>17</sup>. Indeed, up to 75% of deaths from  
88 snakebite are estimated to occur before patients are able to reach healthcare facilities, thus there is  
89 a compelling need to identify novel snakebite treatments that could be administered in the  
90 community soon after a bite<sup>18</sup>.

91 To this end, small molecule-based drugs (i.e. ‘toxin inhibitors’) have received considerable interest as  
92 novel snakebite therapeutics, both as potential individual treatments or in combination with existing  
93 antivenoms<sup>18–20</sup>. Small molecule drugs have a number of potentially advantageous characteristics over  
94 antivenoms, including improved affordability and stability, oral delivery format, higher tolerability<sup>20</sup>,  
95 and improved tissue penetration<sup>21,22</sup>. Previously, Ainsworth *et al* demonstrated the *in vitro* inhibitory  
96 effect of the metal chelator EDTA against SVMP-mediated prothrombin degradation caused by *D.*  
97 *typus* venom, suggesting that small molecule inhibitors may be effective therapeutics for *D. typus*  
98 envenoming<sup>9</sup>. In the same study, Ainsworth *et al* demonstrated in a murine preclinical model that  
99 EDTA was protective against the lethal effects of *Echis ocellatus* venom, an African viper which, similar  
100 to *D. typus* venom, contains a high abundance of SVMP toxins<sup>9</sup>, including prothrombin activators, and  
101 causes VICC in envenomed victims<sup>23,24</sup>. Other small molecule drugs with SVMP-inhibiting potential  
102 include other metal chelators, such as dimercaprol and DMPS (2,3-dimercapto-1-propanesulfonic  
103 acid)<sup>25–27</sup>, and the mimetic matrix metalloprotease inhibitors marimastat, batimastat and

104 prinomastat<sup>22,24,28</sup>. Marimastat and batimastat were found to effectively inhibit SVMP activity and  
105 reduce haemorrhagic pathologies in murine models of *E. ocellatus* envenoming<sup>24</sup>, and inhibit the pro-  
106 coagulant effects of several viper venoms *in vitro*<sup>24,25</sup>. Similarly, prinomastat (AG-3340) showed  
107 inhibitory activity against the haemorrhagic effects of both purified SVMPs and the crude venom of *E.*  
108 *ocellatus*<sup>28</sup>. The metal chelators dimercaprol and DMPS have also been shown to inhibit SVMP activity  
109 of *E. ocellatus* venom *in vitro*, with DMPS also demonstrating *in vivo* preclinical neutralisation of  
110 venom lethality and haemorrhage<sup>26</sup>. While *D. typus* venom is dominated by SVMPs, PLA<sub>2</sub> toxins are  
111 also thought to contribute to the coagulopathy induced by this venom<sup>29</sup>. The small molecule drug  
112 varespladib has been extensively investigated as an inhibitor of venom PLA<sub>2</sub> toxins found in a wide  
113 geographical range of snake species, with such studies showing potent neutralisation of PLA<sub>2</sub>  
114 activity<sup>25,27,30</sup> and associated anticoagulant, haemorrhagic, myotoxic and neurotoxic pathologies<sup>31–35</sup>.  
115 Thus, small molecule treatments for snakebite have the potential to overcome the current species-  
116 specific and restrictive geographical utility of current antivenoms.

117 Despite these promising recent research outcomes, further investigation is required to explore the  
118 inhibitory breadth and potency of small molecule toxin inhibitors due to the ubiquitous variability in  
119 snake venom composition and therefore, also, the variant toxin specificities of these inhibitory small  
120 molecule drugs. In particular, despite overarching similarities in venom composition and ensuing  
121 snakebite pathology between *Echis* spp. and *D. typus*<sup>9</sup>, the SVMPs of *D. typus* have evolved their  
122 prothrombin activating ability independently of those found in the venom of *Echis* spp.<sup>10</sup>.  
123 Consequently, building on previous principles demonstrated for *Echis* spp.<sup>24–26,36</sup>, in this study four  
124 small molecule drugs were investigated *in vitro* and *in vivo* to assess their inhibitory potential against  
125 the venom of *D. typus*. To do so, we applied *in vitro* metalloproteinase and coagulation bioassays on  
126 crude and nanofractionated venom, and *in vivo* murine models of envenoming to assess neutralisation  
127 of venom lethality.

128

## 129 **2. Methods**

130 2.1 Venoms

131 Lyophilised *D. typus* venom (Product code L1403, origin South Africa, purity >99%) was sourced from  
132 Latoxan (Portes les Valence, France) and stored at 4 °C to ensure long-term stability. Prior to use,  
133 venom was resuspended in PBS (pH 7.4, Gibco) at 1 mg/mL for *in vitro* experiments and 5 mg/mL for  
134 *in vivo* experiments.

135

136 2.2 Drug preparations for *in vitro* studies against crude venom

137 The small molecule SVMP inhibitors tested were; dimercaprol (2,3-dimercapto-1-propanol, ≥98 %  
138 iodometric, Cat no: 64046, Sigma), DMPS (2,3-dimercapto-1-propane-sulfonic acid sodium salt  
139 monohydrate, 98%, Cat no: H56578, Alfa Aesar), marimastat ((2*S*,3*R*)-*N*4-[(1*S*)-2,2-Dimethyl-1-  
140 [(methylamino)carbonyl]propyl]-*N*1,2-dihydroxy-3-(2-methylpropyl)butanediamide, >98%, Cat no:  
141 2631, Tocris Bioscience), prinomastat hydrochloride (Cat no: HY-12170A, >98%, MedChemExpress).  
142 Varespladib (2-[[3-(2-Amino-2-oxoacetyl)-2-ethyl-1-(phenylmethyl)-1*H*-indol-4-yl]oxy]-acetic acid, Cat  
143 no: SML1100, >98% HPLC, Sigma) was used as a small molecule drug control. All drugs were  
144 reconstituted in dimethyl sulfoxide (DMSO) (Sigma) to 10 mM stocks and stored at -20 °C. Daughter  
145 plates were created at 1 mM concentrations in 384-well format to allow the creation of assay-ready  
146 plates using a VIAFLO 384 electronic pipette (Integra). Both daughter plates and assay-ready plates  
147 were stored at -20 °C, with the latter used within a month of creation. For the SVMP assay 0.91 µL of  
148 each drug was plated (final reaction volume of 91 µL), while 0.5 µL was plated for the coagulation  
149 assay (final reaction volume of 50 µL). For marimastat, prinomastat and varespladib, dose response  
150 curves were created at a final concentration range of 10 µM to 4.8 pM using a two-fold dilution (50  
151 µL drug into 50 µL of DMSO), with each concentration tested in duplicate. For DMPS and dimercaprol,  
152 dose response curves were created at a final concentration range of 160 µM to 76.3 pM using a two-  
153 fold dilution (50 µL drug into 50 µL of DMSO), with each concentration tested in duplicate.

154

155 2.3 *In vitro* neutralisation of coagulopathic crude venom activity

156 To assess the inhibitory potency of the selected drugs against coagulopathic venom activity we used  
157 a previously described absorbance-based plasma clotting assay<sup>37</sup>. Citrated bovine plasma (VWR) was  
158 defrosted and centrifuged at 858 x g for 5 minutes to remove precipitates before use. Thereafter, 100  
159 ng of venom in 10 µL PBS was added to each well in the 384-well assay-ready plate (containing 0.5 µL  
160 of 1 mM of inhibitor) using a VIAFLO 384, the plate was then briefly spun down in a Platefuge  
161 (Benchmark Scientific) and incubated at 37 °C for 25 minutes, followed by a further five minutes  
162 acclimatisation at room temperature. Next, 20 µL of 20 mM CaCl<sub>2</sub> was added using a MultiDrop 384  
163 Reagent Dispenser (ThermoFisher Scientific), followed by the immediate addition of 20 µL citrated  
164 bovine plasma. The plate was then immediately read for kinetic absorbance at 595 nm for 116 minutes  
165 using a FLUOstar Omega platereader (BMG Labtech).

166 Assays were performed in triplicate and each assay contained technical duplicates at each dose.  
167 Positive control values were generated using DMSO + venom, and negative control values were  
168 generated using DMSO in the absence of venom. All compounds were analysed for their ability to  
169 return clotting to normal at the timepoint at which the positive and negative absorbance values were  
170 furthest apart. For this, the raw values were normalised to show percentage of normal clotting, e.g. a  
171 value of 100% meant the compound returned clotting to that of the negative control. These  
172 percentage values were plotted and fitted with a nonlinear regression curve for the normalised  
173 response (variable slope) using to calculate the IC<sub>50</sub> data and 95% confidence intervals for each  
174 compound using GraphPad Prism 9.0 (GraphPad Software, San Diego, USA). Multiple comparisons  
175 one-way ANOVA test was used to compare IC<sub>50</sub> values generated for each replicate plate, using  
176 GraphPad Prism 9.0.

177

#### 178 2.4 Venom nanofractionation

179 To further explore the inhibitory specificity of the selected drugs, we fractionated *D. typus* into toxin  
180 constituents and repeated the plasma bioassay. Venom nanofractionation<sup>29,38</sup> was performed on a  
181 UPLC system ('s Hertogenbosch, The Netherlands) controlled by Shimadzu Lab Solutions software.

182 Venom solution was prepared by dissolving lyophilised *D. typus* venom into water (purified by Milli-Q  
183 Plus system, Millipore) to a concentration of 5.0 mg/mL and stored at  $-80^{\circ}\text{C}$  until use. For each  
184 analysis, 50  $\mu\text{L}$  venom solution (1.0 mg/mL) was injected by a Shimadzu SIL-30AC autosampler after  
185 diluting the stock venom solutions ( $5.0 \pm 0.1$  mg/mL) in Milli-Q water. A Waters XBridge reversed-  
186 phase C18 column (4.6  $\times$  100 mm column with a 5  $\mu\text{m}$  particle size and a 300  $\text{\AA}$  pore size) was used for  
187 gradient separation at  $30^{\circ}\text{C}$ . Mobile phase A was composed of 98% water, 2% acetonitrile (ACN)  
188 (Biosolve) and 0.1% formic acid (FA) (Biosolve), while mobile phase B was composed of 98% ACN, 2%  
189 water and 0.1% FA. The total solvent flow rate was maintained at 0.5 mL/min and the gradients were  
190 run as follows: linear increase of eluent B from 0 to 50% in 20 min followed by a linear increase to 90%  
191 B in 4 min, then isocratic elution at 90% for 5 min, subsequently the eluent B was decreased from 90%  
192 to 0% in 1 min followed by an equilibration of 10 min at 0% B. The column effluent was split as two  
193 parts (9:1), with the smaller fraction (10%) sent to a Shimadzu SPD-M20A prominence diode array  
194 detector. The larger fraction (90%) was directed to a FractioMate nanofractionator (SPARK-Holland &  
195 VU) and fractions collected onto transparent 384-well plates (F-bottom, rounded square well,  
196 polystyrene, without lid, clear, non-sterile; Greiner Bio One). The nanofractionator was controlled by  
197 FractioMator software (Spark-Holland) to collect fractions continuously at a resolution of 6 s/well.  
198 After collection, the well plates with venom fractions were dried overnight in a Christ Rotational  
199 Vacuum Concentrator (RVC 2-33 CD plus, Zalm en Kipp, Breukelen, The Netherlands), to remove any  
200 solvent remaining in the wells. The vacuum concentrator was equipped with a cooling trap maintained  
201 at  $-80^{\circ}\text{C}$  during operation. The dried plates were then stored at  $-20^{\circ}\text{C}$  until bioassaying.

202

### 203 2.5 *In vitro* neutralisation of coagulopathic venom toxin fractions

204 The small molecule inhibitors marimastat ((2S,3R)-N4-[(1S)-2,2-Dimethyl-1-[(methylamino)carbonyl]  
205 propyl]-N1,2-dihydroxy-3-(2-methylpropyl) butanedia-mide), prinomastat hydrochloride (AG-3340  
206 hydrochloride), dimercaprol (2,3-Dimercapto-1-propanol), DMPS (2,3-dimercapto-1-propane-sulfonic  
207 acid sodium salt monohydrate) and varespladib (A-001) were purchased from Sigma-Aldrich. Bovine



208 plasma (Sodium Citrated, Sterile Filtered, Product Code: S0260) was purchased from Biowest. For  
209 assay preparation, the CaCl<sub>2</sub> (Biosolve), which was used to de-citrate plasma to initiate coagulation in  
210 the coagulation assay, was dissolved in Milli-Q water to 20 mM. The inhibitors were dissolved in DMSO  
211 ( $\geq 99.9\%$ , Sigma-Aldrich) to a concentration of 10 mM and stored at  $-20\text{ }^{\circ}\text{C}$ . The plasma was defrosted  
212 and then centrifuged at 2000 rpm ( $805 \times g$ ) for 4 min in a 5810 R centrifuge (Eppendorf) to remove  
213 possible particulate matter. The inhibitor stock solutions were diluted in PBS buffer to the described  
214 concentrations, then 10  $\mu\text{L}$  of each diluted inhibitor solution was pipetted to all wells of plate wells  
215 containing freeze-dried nanofractionated venom fractions by a VWR Multichannel Electronic Pipet,  
216 followed by centrifuging the plate for 1 min at  $805 \times g$ . Next, a pre-incubation step for 30 min at room  
217 temperature was performed. Final concentrations of inhibitor solutions used for the coagulation  
218 bioassay were 20, 4, 0.8, 0.16 and/or 0.032  $\mu\text{M}$  (with corresponding DMSO final concentrations of  
219 0.02%, 0.004%, 0.0008%, 0.00016% and 0.000032%, respectively). After this incubation step, the HTS  
220 coagulation assay was performed as described by Still *et al*<sup>37</sup>. A Multidrop 384 Reagent Dispenser  
221 (Thermo Fisher Scientific) was used to dispense 20  $\mu\text{L}$  of CaCl<sub>2</sub> solution onto all wells of the 384-well  
222 plates, followed by 20  $\mu\text{L}$  plasma after rinsing of the Multidrop with deionized water between  
223 dispensing. Kinetic absorbance measurements were conducted immediately for 100 min at 595 nm  
224 and  $25\text{ }^{\circ}\text{C}$  using a Varioskan Flash Multimode Reader (Thermo Fisher Scientific). Venom-only analyses  
225 were performed as control experiments, for which 10  $\mu\text{L}$  PBS instead of inhibitor solution was added  
226 to all wells of the vacuum-centrifuge-dried nanofractionated well plates. Each nanofractionation  
227 analysis was performed in at least duplicate.

228 The resulting coagulation chromatograms were plotted as described by Slagboom *et al*<sup>29</sup>, with each  
229 chromatogram reconstructed to display ‘very fast coagulation’, ‘slightly/medium increased  
230 coagulation’ and ‘anticoagulation’. To plot the very fast coagulation chromatogram, the average slope  
231 of the first five minutes in the assay was plotted, and for the slightly/medium coagulation  
232 chromatogram the average slope of the first 20 minutes was plotted. For anticoagulant chromatogram  
233 the final (end-point) read at 100 minutes was plotted. Clotting velocities were all plotted against the

234 venom nanofractionation time, producing positive peaks for procoagulant compounds and negative  
235 peaks for anticoagulant compounds.

236

## 237 2.6 In vitro neutralisation of venom SVMP activity

238 The SVMP activity of crude *D. typus* venom in the presence of inhibitors or vehicle control (DMSO),  
239 was measured using a quenched fluorogenic substrate (ES010, R&D Biosystems), in line with principles  
240 previously described<sup>26</sup>. The substrate was suspended in reaction buffer (150 mM NaCl, 50 mM Tris-  
241 HCl pH 7.5) and used at a final concentration of 10  $\mu$ M (supplied as a 6.2 mM stock). Reactions  
242 consisted of 1  $\mu$ g of venom (1  $\mu$ g in 15  $\mu$ L PBS) co-incubated with 0.91  $\mu$ L of 1 mM of inhibitor. The  
243 384 well plate (Greiner) was briefly spun down in a Platefuge (Benchmark Scientific) and incubated at  
244 37 °C for 25 minutes, with an additional 5 minutes acclimatisation at room temperature, before the final  
245 addition of the freshly diluted fluorogenic substrate (75  $\mu$ L of 12.1  $\mu$ M). The plate was immediately  
246 run on a CLARIOstar platereader (BMG Labtech) at an excitation wavelength of 320-10 nm and  
247 emission wavelength of 420-10 nm with 10 flashes per well at 25 °C for 100 cycles (each cycle time 79  
248 seconds). The assay was performed independently in technical duplicate. The end-reads were  
249 calculated for each sample at the time where all fluorescence curves had typically reached a plateau  
250 (maximum fluorescence). SVMP activity was calculated for each test condition as a percentage of the  
251 mean of the DMSO only wells (100% activity), with a baseline of the marimastat 10  $\mu$ M controls  
252 representing 0% activity. IC<sub>50</sub> values were calculated from the percentage inhibition values by fitting  
253 a nonlinear regression curve for the normalised response (variable slope) for each compound using  
254 GraphPad Prism 9.0 (GraphPad Software, San Diego, USA). The best-fit IC<sub>50</sub> values for each replicate  
255 were compared to identify significant differences between the IC<sub>50</sub> values for each drug using one-  
256 way multiple comparisons ANOVA analysis in GraphPad Prism 9.0.

257

## 258 2.7 In vivo neutralisation of venom lethality

### 259 2.7.1 Animal ethics

260 All animal experiments were performed using protocols approved by the Animal Welfare and Ethical  
261 Review Boards of the Liverpool School of Tropical Medicine and the University of Liverpool, under  
262 project licence (P58464F90) approved by the UK Home Office in accordance with the UK Animal  
263 (Scientific Procedures) Act 1986.

264

#### 265 2.7.2 Animal maintenance

266 Male CD1 mice (18-20g) were sourced from Charles River (UK) and acclimatised for a minimum of one  
267 week before experimentation. Mice were grouped in cages of five, with room conditions of  
268 approximately 22 °C at 40-50% humidity, with 12/12 hour light cycles, and given *ad lib* access to CRM  
269 irradiated food (Special Diet Services, UK) and reverse osmosis water in an automatic water system.  
270 Mice were housed in specific-pathogen free facilities in Techniplast GM500 cages containing Lignocell  
271 bedding (JRS, Germany), Sizzlenest zigzag fibres as nesting material (RAJA), and supplied with  
272 environmental enrichment materials.

273

#### 274 2.7.3 Co-incubation model of preclinical efficacy

275 The median murine lethal dose (LD<sub>50</sub>) for *D. typus* venom administered by intravenous injection was  
276 previously determined as 22.29 µg per mouse<sup>9</sup>. To determine the efficacy of small molecule inhibitors  
277 against *D. typus* venom, a refined version of the WHO recommended antivenom ED<sub>50</sub> neutralisation  
278 experiments was used, in which ~4 x LD<sub>50</sub> doses of venom (90 µg) were pre-incubated with each small  
279 molecule inhibitor. Drug stocks were freshly prepared to allow for a ratio of 1:1.33 venom to inhibitor  
280 as previously defined by marimastat *in vivo* testing against other snake venoms<sup>36</sup>. Drugs tested *in vivo*  
281 were dimercaprol (2,3-dimercapto-1-propanol ≥98 % iodometric, Cat no: 64046, Sigma-Aldrich),  
282 marimastat (>98% HPLC, Cat no: M2699, Sigma-Aldrich), and prinomastat hydrochloride (≥95% HPLC,  
283 Cat no: PZ0198, Merck), all resuspended at 1 mg/mL in water, and DMPS (2,3-dimercapto-1-  
284 propanesulfonic acid sodium salt monohydrate, 95%, Cat no: H56578, Alfa Aesar) resuspended at  
285 1mg/mL in PBS. Groups of five mice received experimental doses that consisted of either: (a) venom

286 only (4 x LD<sub>50</sub> dose) or (b) venom (4 x LD<sub>50</sub> dose) with drug (118 µg) or (c) drug only (118 µg) to assess  
287 drug safety. The control group was the venom only group, against which all drug treatments were  
288 compared. Each experimental group comprised 5 animals as this was previously determined to be the  
289 minimum number of animals required to produce statistically significant results<sup>39</sup>. No randomisation  
290 was used to allocate experimental groups – mice were randomly allocated into cages of five prior to  
291 the experiment, and each cage formed one treatment group. No criteria for including or excluding  
292 animals was applied, and all data points were included in analyses. A total of 45 mice were used. All  
293 experimental doses were prepared to a volume of 200 µL in PBS and incubated at 37 °C for 30 mins  
294 prior to intravenous injection via the tail vein. Animals were monitored for humane endpoints (loss of  
295 righting reflex, seizure, external haemorrhage) for six hours, and any animals showing such signs were  
296 immediately euthanised by rising concentrations of carbon dioxide. All observations were performed  
297 by mixed gender experimenters who were blinded to the drug group allocation. Time of death,  
298 number of deaths and number of survivors were recorded, where deaths and times of death represent  
299 implementation of humane endpoint-dictated euthanasia. Kaplan-Meier survival plots were  
300 generated using GraphPad Prism 9.0 (GraphPad Software, San Diego, USA) and log-rank (Mantel-Cox)  
301 tests were used to statistically compare the survival times between groups treated with and without  
302 drug.

303

### 304 **3. Results**

#### 305 **3.1 Small molecule drugs have varying effects on the procoagulant activity of crude *D. typus* venom**

306 The addition of *D. typus* venom to recalcified bovine plasma in the coagulation assay resulted in earlier  
307 stimulation of clotting compared to the no venom control (natural clotting), highlighting the  
308 procoagulant nature of this venom (Figure 1A). The effects of the small molecules against the  
309 procoagulant activity of crude *D. typus* venom are shown in Figure 1. Weak inhibitory effects were  
310 observed for the metal chelators dimercaprol and DMPS at micromolar concentrations. As shown in  
311 Figure 1B, concentrations of 160 µM showed strong inhibitory activity for both drugs, but this

312 inhibitory effect rapidly decreased at lower concentrations, with no effect observed at concentrations  
313 of 10  $\mu\text{M}$  and lower.  $\text{IC}_{50}$  values were determined to be 77.7  $\mu\text{M}$  for dimercaprol and 120  $\mu\text{M}$  for  
314 DMPS (Figure 1C), although due to the small number of data points between 0 and 100% inhibition  
315 these values must be interpreted with caution and 95% confidence intervals were unable to be  
316 calculated. Contrastingly, the peptidomimetic matrix metalloproteinase inhibitors marimastat and  
317 prinomastat potently neutralised the procoagulant effects of *D. typus* venom (Figure 1B). The  $\text{IC}_{50}$   
318 values for marimastat and prinomastat were determined to be 34.2 nM (95% CI 24.2 to 48.5 nM) and  
319 75.6 nM (95% CI 58.6 to 97.7 nM) respectively (Figure 1C), demonstrating that marimastat was  
320 significantly more potent in this assay than prinomastat ( $p = 0.01$ ). The  $\text{PLA}_2$  inhibitor varespladib  
321 (control non-SVMP inhibiting drug used throughout) had no neutralising effect on venom-induced  
322 coagulation at any of the tested drug concentrations (Supplemental File S1), a result in line with our  
323 expectations of procoagulant venom activity being mediated by SVMP toxins.

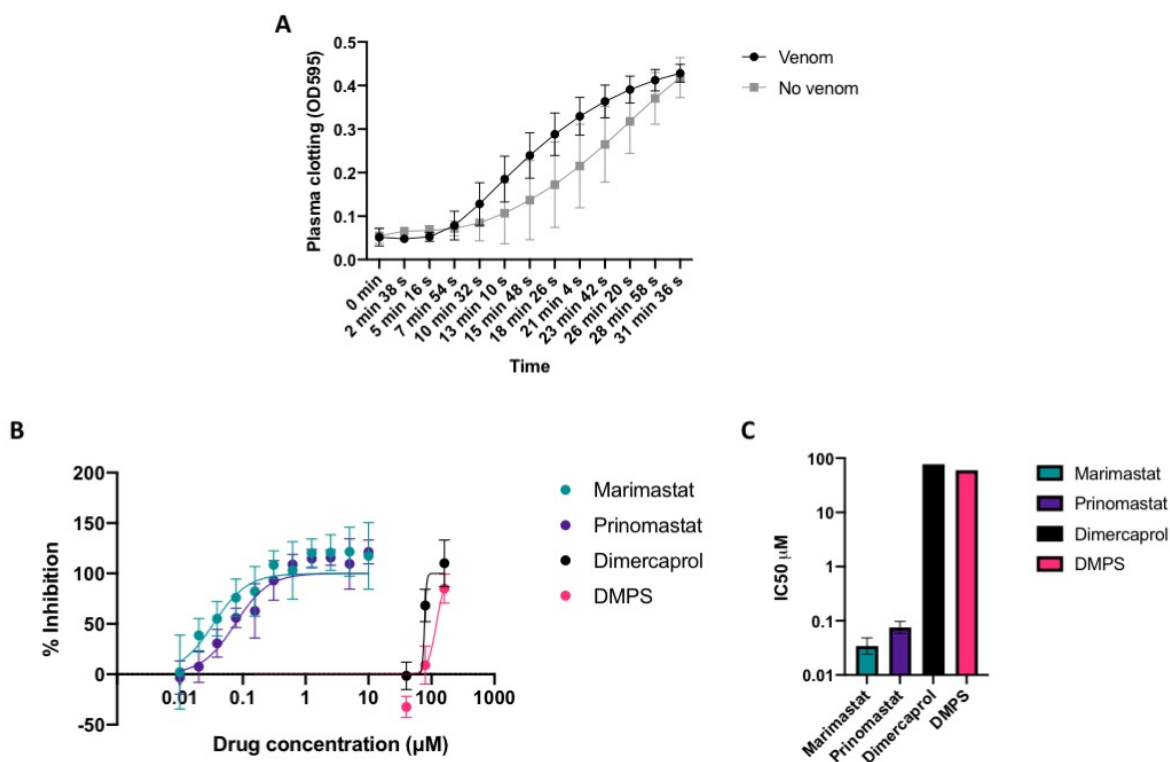

324 **Figure 1. Effects of *D. typus* venom, and inhibition by small molecule drugs, on *in vitro* plasma**  
325 **clotting measured by absorbance at 595 nm (OD<sub>595</sub>).** Inhibitory activity is expressed as a percentage  
326 of normal clotting, where 100% inhibition represents return of clotting to normal plasma clotting  
327

328 levels. **A)** Clotting as indicated by the increase in OD<sub>595</sub> in the presence of crude *D. typus* venom (black  
329 circles) compared to normal clotting in the absence of venom (grey squares). Data points represent  
330 the mean of twelve individual values recorded over three independent technical replicates, and error  
331 bars represent standard deviation. **B)** Inhibitory activity of marimastat (teal circles), prinomastat (dark  
332 purple circles), dimercaprol (light purple circles) and DMPS (pink circles) over a two-fold serial dilution  
333 curve, from which IC<sub>50</sub> values were calculated. Data points represent the mean of six individual values  
334 recorded over three independent technical replicates, and error bars represent standard deviation. **C)**  
335 Calculated IC<sub>50</sub> values for marimastat, prinomastat, dimercaprol and DMPS. Data points represent the  
336 best fit IC<sub>50</sub> value and error bars represent 95% confidence intervals (not calculated for dimercaprol  
337 and DMPS).

338

### 339 **3.2 Inhibitory effects of small molecule drugs on nanofractionated *D. typus* venom coagulotoxins**

340 To further characterise the coagulopathic activity of *D. typus* venom, and to better explore the  
341 specificity of the various small molecule inhibitors against specific toxins, we repeated the coagulation  
342 assay experiments using nanofractionated venom. As previously described, this method uses  
343 fractionated venom as the basis for measurements of the velocity of clotting in different wells in  
344 comparison to control wells, with procoagulant toxins producing positive peaks in the resulting  
345 bioassay chromatogram and anticoagulant toxins producing negative peaks<sup>37</sup>. In the venom-only  
346 analysis, broad positive peaks (18.4-22.0 min) were observed for both the 'very fast coagulation'  
347 chromatograms and the 'slightly/medium increased coagulation' chromatograms, indicative of an  
348 overall procoagulant effect of the venom. Detected bioactivities of *D. typus* venom were correlated  
349 with previously generated LC-MS and proteomics data<sup>29</sup>, and a candidate toxin mass of 23 kDa was  
350 identified for the pro-coagulant activity, which is within the range of SVMs. The inhibitory effects of  
351 the matrix metalloproteinase inhibitors marimastat and prinomastat on nanofractionated *D. typus*  
352 venom toxins are depicted in Figure 2A and 2B respectively. The peaks in the very fast and  
353 slight/medium increased coagulation chromatograms decreased with increasing concentrations of

354 both marimastat and prinomastat, indicative of a dose-dependent restoration of normal clotting  
355 velocity. All coagulopathic activities were inhibited at 0.8  $\mu$ M marimastat and 0.16  $\mu$ M prinomastat  
356 for very fast coagulation chromatograms, and at 4  $\mu$ M for both inhibitory molecules for  
357 slightly/medium increased coagulation activity. In terms of the metal chelators dimercaprol and  
358 DMPS, their inhibitory effects on nanofractionated *D. typus* venom toxins are depicted in Figure 2C  
359 and 2D, respectively. By increasing the concentration range of dimercaprol, the procoagulation  
360 activity of *D. typus* venom was inhibited, with very fast coagulation activity fully inhibited at 4  $\mu$ M, and  
361 slightly/medium increased coagulation activity at 20  $\mu$ M. However, no substantial inhibition of  
362 procoagulant venom activity was observed with DMPS at any tested concentration up to 20  $\mu$ M. These  
363 results reflect the considerable potency differences observed between the peptidomimetic inhibitors  
364 and the metal chelators in the crude venom plasma bioassays.

365 A very weak signal (peak centre at 19.6 min) was also detected in terms of anticoagulant venom  
366 activity. A previous study observed a much clearer negative anticoagulant peak with *D. typus* venom,  
367 though the venom was applied at a five-fold higher concentration (5.0 mg/mL venom) than that used  
368 in this study (1.0 mg/mL venom)<sup>29</sup>. While varespladib has previously been demonstrated to be a  
369 potent inhibitor of anticoagulant venom activities induced by PLA<sub>2</sub> toxins<sup>33,40-42</sup>, in this study it  
370 produced no inhibitory effects on venom-induced coagulation, whether procoagulant or  
371 anticoagulant, at the maximal drug dose tested (20  $\mu$ M) (Supplemental File S2). However, due to the  
372 weak anticoagulant venom activity observed in these experiments, the assay window for measuring  
373 such inhibition is limited.



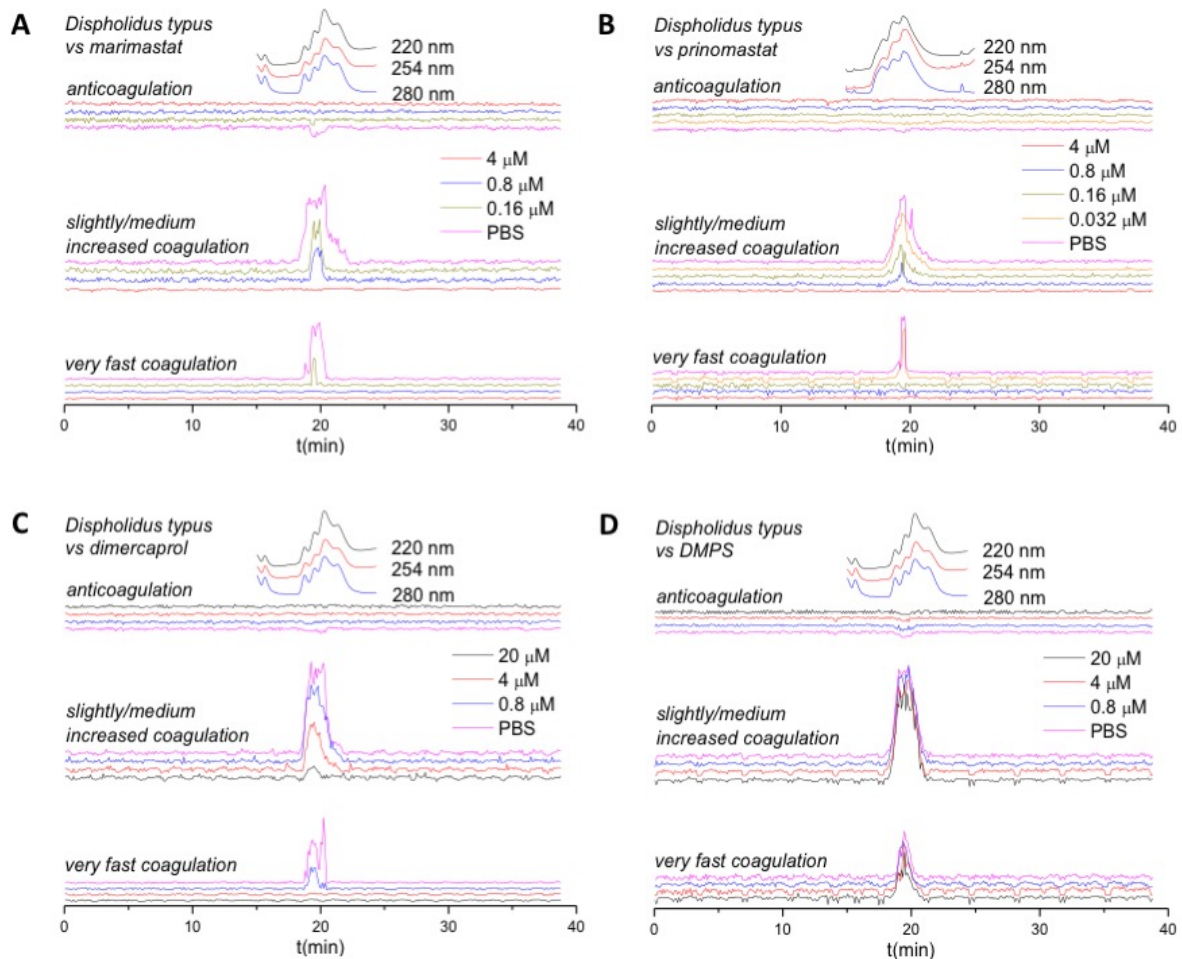

374

375 **Figure 2. Reconstructed coagulation chromatograms for nanofractionated *D. typus* venom toxins in**

376 **the presence of different concentrations of A) marimastat, B) prinomastat, C) dimercaprol, and D)**

377 **DMPS.** The negative peaks indicate anticoagulant activity where velocity is lower than the assay

378 solution in control wells without venom toxins, and the positive peaks indicate pro-coagulant activity

379 where velocity is higher than that in control wells without venom toxins. The top superimposed

380 chromatograms are characteristic profiles of the UV trace at 220, 254 and 280 nm. PBS indicates

381 venom only samples where PBS was used as a control for the inhibitors. Traces with different colours

382 indicate different concentrations (final) of inhibitors in the assay.

383

### 384 **3.3 Small molecule drugs inhibit crude *D. typus* venom SVMP activity**

385 To determine the specific inhibitory effects of the selected small molecule drugs on SVMP toxin

386 activity, we performed IC<sub>50</sub> screens of the five different toxin inhibitors in a previously defined kinetic



387 enzymatic assay SVMP using crude *D. typus* venom. As previously observed<sup>43</sup>, *D. typus* venom  
388 demonstrated strong SVMP-specific activity in this assay. The inhibitory effects of the matrix  
389 metalloproteinase inhibitors marimastat and prinomastat and the metal chelators DMPS and  
390 dimercaprol against the venom SVMP activity of *D. typus* are displayed in Figure 3. The peptidomimetic  
391 inhibitors marimastat and prinomastat demonstrated nanomolar IC<sub>50</sub> values of 14.5 (95% CI 13.9 to  
392 15.2 nM) and 25.9 nM (95% CI 22.6 to 29.7 nM) respectively, and complete inhibition of venom activity  
393 at 156 nM for marimastat and 2.5 μM for prinomastat (Figure 3A). Inhibition of SVMP activity by  
394 dimercaprol and DMPS as measured by IC<sub>50</sub> values was significantly lower than that observed for  
395 marimastat and prinomastat ( $p < 0.02$  for all comparisons). Dimercaprol and DMPS demonstrated  
396 highly comparable inhibition of *D. typus* SVMP activity with complete inhibition obtained at 40 μM  
397 and IC<sub>50</sub> values of 6.68 (95% CI 6.36 to 7.02 μM) and 6.61 μM (95% CI 6.38 to 6.87 μM), respectively  
398 (Figure 3B), with no significant differences between the two IC<sub>50</sub> values. As anticipated, the control  
399 drug used in this study, the PLA<sub>2</sub> inhibitor varespladib, showed no inhibitory activity at any of the  
400 concentrations tested (maximum concentration 10 μM) (Supplemental File S3).

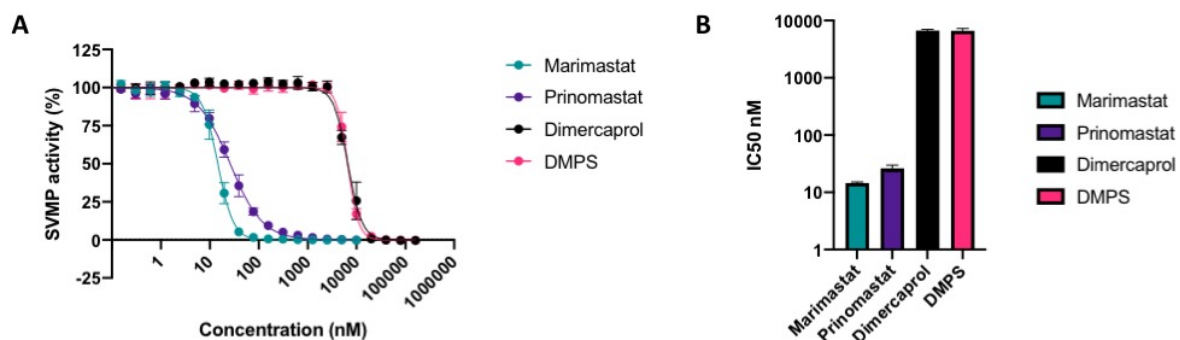

401  
402 **Figure 3. *In vitro* inhibition of *D. typus* crude venom SVMP activity by small molecule inhibitors. A)**  
403 SVMP activity of *D. typus* crude venom in the presence of marimastat (teal circles), prinomastat (dark  
404 purple circles), dimercaprol (light purple circle) and DMPS (pink circles) over a two-fold serial dilution  
405 curve ranging from which IC<sub>50</sub> values were calculated. Data points represent the percentage of crude  
406 venom SVMP activity generated from the mean of four individual values recorded over two  
407 independent technical replicates, and error bars represent standard deviation. **B)** IC<sub>50</sub> values of SVMP  
408 inhibition for marimastat, prinomastat, dimercaprol and DMPS.

409

410 **3.4 Marimastat and DMPS provide some protection against *D. typus* venom-induced lethality *in vivo***

411 Given that inhibition of SVMP and coagulotoxic activities *in vitro* have previously been demonstrated  
412 to translate into varying degrees of *in vivo* protection against systemic envenoming<sup>26,36</sup> we next tested  
413 the capability of the four SVMP-inhibiting small molecule drugs to protect against *D. typus* venom-  
414 induced lethality *in vivo*. To do so, we used a modified version of the WHO-recommended protocol of  
415 murine venom neutralisation (ED<sub>50</sub> assay). All five experimental animals treated intravenously with 4  
416 x LD<sub>50</sub> doses of *D. typus* venom (90 µg) succumbed to the lethal venom effects within the first hour of  
417 the experiment (mean 17 minutes, range 1 to 40 minutes), as shown in Figure 4. The intravenous co-  
418 delivery of preincubated drugs with *D. typus* venom revealed that both prinomastat and dimercaprol  
419 failed to protect against venom induced lethality at the single therapeutic dose tested (118 µg), with  
420 all experimental animals in these groups succumbing to venom lethality within the first 30 minutes  
421 (mean 7.8 minutes for both groups; prinomastat range 4 to 21 minutes; dimercaprol range 1 to 18  
422 minutes), in a highly comparable manner to the venom only control. Contrastingly, DMPS and  
423 marimastat both showed a significant degree of protection against *D. typus* venom-induced lethality.  
424 Three of the five experimental animals dosed with DMPS were protected for the duration of the  
425 experiment, with two deaths occurring within the first hour, resulting in a mean survival time of 224  
426 minutes compared to 17.2 minutes in the venom only group (log-rank test, p = 0.047). Of the animals  
427 dosed with marimastat, four of the five animals were protected for the duration of the experiment,  
428 with mean survival times of 316.2 minutes compared to 17.2 minutes in the venom only group (log-  
429 rank test, p = 0.002). The single non-surviving experimental animal in this drug group was euthanised  
430 at 141 minutes. No adverse effects were observed in experimental animals dosed with any of the  
431 drugs only controls and, consequently, all survived the duration of the experiment (Figure 4).

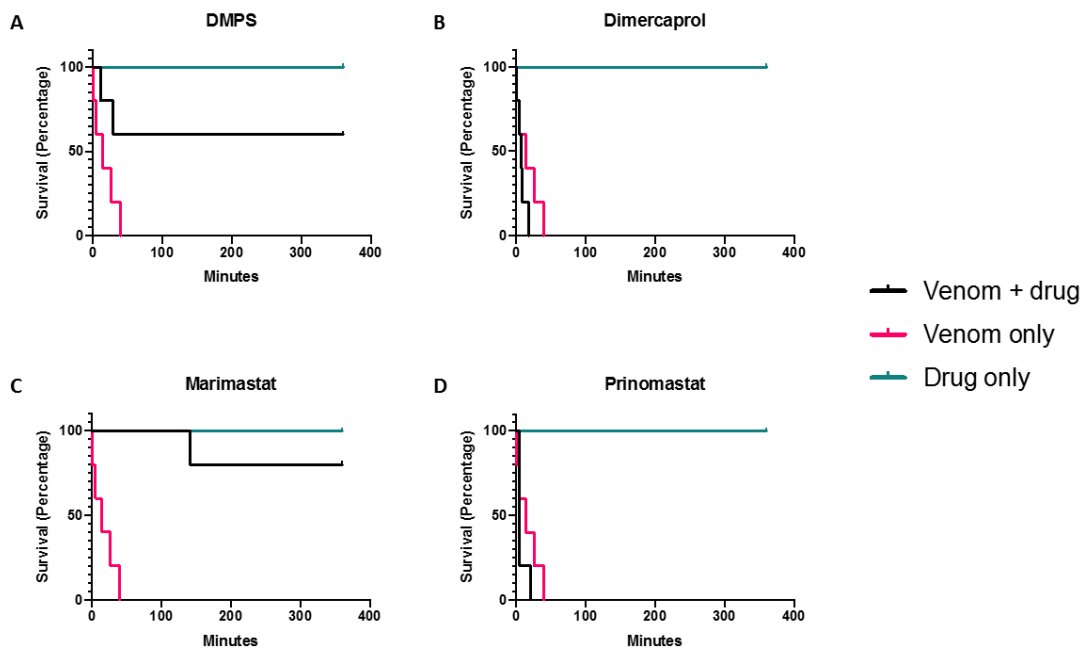

432

433 **Figure 4. The small molecule drugs marimastat and DMPS significantly increase the survival times**

434 **of mice receiving lethal doses of *D. typus* venom.** The data is shown in Kaplan-Meier survival graphs

435 for experimental animals (n=5 per group, except prinomastat only group where n=1) treated with

436 either: 90  $\mu$ g (4 x LD<sub>50</sub>) of *D. typus* venom only (magenta), 118  $\mu$ g of drug only (cyan) or 90  $\mu$ g venom

437 and 118  $\mu$ g drug (black). Treatments were pre-incubated at 37 °C for 30 minutes prior to intravenous

438 injection via the tail vein and animals were monitored for 6 hours. Data is shown for: **A) DMPS, B)**

439 **dimercaprol, C) marimastat, and D) prinomastat**

440

#### 441 **4. Discussion**

442 Conventional animal-derived antivenom, although a life-saving treatment, has numerous deficiencies

443 that impair its utility in the treatment of snakebite. Although a seemingly effective antivenom for

444 treating *D. typus* envenomation is available in South Africa, it is often difficult to source in other

445 regions of the continent and can be catastrophically unaffordable for patients<sup>13</sup>, and this scenario

446 encapsulates the challenges faced by snakebite victims world over. There is therefore an urgent need

447 to develop alternative/supplementary therapeutics that are stable, effective, affordable and available

448 in remote rural areas where medical access is limited. Small molecule inhibitors that can broadly

449 neutralise a class of key toxins in snake venom following oral administration are possible solutions in  
450 this regard<sup>20</sup> and Phase II clinical trials for small molecule inhibitors of snakebite are underway<sup>44</sup>.  
451 Rapid-onset pathologies such as VICC, together with tissue damage induced by SVMPs, are only  
452 partially neutralised by antibody based antivenoms<sup>45</sup>, which suffer from poor tissue distribution due  
453 to the inherent large size of antibodies<sup>46</sup>. By contrast, the drastically smaller size of the inhibitors  
454 tested in this study enables favourable properties of rapid and effective tissue penetration and  
455 potential for oral delivery, due to their pharmacokinetic and physicochemical properties<sup>34,35,47</sup>.  
456 Moreover, repurposing these small molecule inhibitors that are either licensed drugs or phase I-  
457 approved drug candidates could significantly shorten drug development times as safety profiles,  
458 pharmacokinetics, bioavailability and tolerance data on these molecules have already obtained<sup>47-49</sup>.  
459 Current evidence of the utility of small molecule inhibitors against snakebite indicates that they may  
460 be particularly effective as first line, early intervention, therapeutics and/or bridging therapies for  
461 initial and adjunct treatment in community settings, before patients are able to access antivenom in  
462 healthcare centres<sup>18,28,48</sup>.  
463 In this study we assessed the ability of four small molecule inhibitors to neutralise *D. typus* venom  
464 toxin activities *in vitro* and *in vivo*. In line with previous findings<sup>8-11</sup>, our study demonstrates that *D.*  
465 *typus* venom toxicity is largely conferred by SVMP toxins, which are likely responsible for causing  
466 coagulopathy *in vivo*. Our data from *in vitro* assays of *D. typus* venom activity demonstrate that the  
467 matrix metalloproteinase inhibitors marimastat and prinomastat are potent inhibitors of the SVMP-  
468 mediated procoagulant effects of this venom, with both compounds demonstrating similar inhibitory  
469 activity in *in vitro* assays of plasma coagulation and SVMP activity. Indeed, marimastat and  
470 prinomastat showed nanomolar IC<sub>50</sub> values in the crude venom plasma coagulation assay and crude  
471 venom SVMP assay, and both drugs showed inhibitory effects at low micromolar concentrations in  
472 the plasma coagulation assay with nanofractionated venom. However, and in contrast with *in vitro*  
473 SVMP-inhibiting prowess, in the *in vivo* assays, all animals in the prinomastat group succumbed to  
474 lethality from *D. typus* venom in murine models of envenomation, whilst an equivalent amount of

475 marimastat conferred 80% protection. This was unexpected and hints at different levels of drug  
476 exposure and metabolism in this single dose intravenous-delivered model, as both matrix  
477 metalloproteinase inhibitors showed potent inhibitory activity in the *in vitro* assays and both have  
478 been shown in other studies to neutralise the *in vivo* lethal effects of *E. ocellatus* in murine models<sup>24,26</sup>.  
479 The metal chelators dimercaprol and DMPS demonstrated lower potency than marimastat and  
480 prinomastat in the *in vitro* studies of SVMP activity and plasma coagulation, whilst the PLA<sub>2</sub> inhibitor  
481 varespladib, used as a non-SVMP inhibiting control, produced no inhibitory effects on venom. Of the  
482 two metal chelators, DMPS showed the weakest inhibitory activity in *in vitro* assays of venom  
483 bioactivity. Despite this reduced *in vitro* potency in comparison with the peptidomimetic matrix  
484 metalloproteinase inhibitors, DMPS conferred a degree of protection against venom lethality in  
485 murine models of envenomation, with significant increases in mean survival times and 60% of mice  
486 surviving until the end of the experimental time window. None of the experimental animals dosed  
487 with the other metal chelator, dimercaprol, survived the experiment, despite the comparable  
488 mechanism of action and *in vitro* inhibitory potency in the coagulation and SVMP assays. These results  
489 contrast with our previous preclinical study investigating *E. ocellatus* envenoming, which found that  
490 both dimercaprol and DMPS provided protection against lethal effects in this same intravenous  
491 murine model, though are consistent with DMPS exhibiting superior preclinical efficacy<sup>26</sup>.  
492 The notable discrepancies between the *in vitro* and *in vivo* experiments described herein exemplifies  
493 the complexity associated with relying on *in vitro* potency-based screens as a means to predict the  
494 efficacy of small molecule drugs in *in vivo* experiments. While efficacy data gained from *in vitro*  
495 experiments is undoubtedly an essential prerequisite prior to preclinical efficacy testing, substantial  
496 differences in inhibitor potency at this step does not preclude preclinical efficacy, which ultimately is  
497 dictated by drug exposure. Equally, the preclinical model utilised here, consisting of the pre-incubation  
498 of drug with venom followed by codelivery intravenously, is largely detached from the clinical scenario  
499 of a snakebite. While this is the WHO-recommended method for preclinical assessment of antivenom  
500 efficacy, and thus is a logical starting point for assessing preclinical efficacy, this method does not

501 reflect the biodistribution of venom during early envenomation, uses a non-clinically relevant route  
502 of venom injection, and does not take into account the pharmacokinetics/pharmacodynamics of the  
503 unbound test inhibitor<sup>50</sup>. Thus, the lack of efficacy observed with prinomastat (compared with  
504 marimastat) here, for example, may be the result of a lack of dose optimisation and thus sub-optimal  
505 exposure. Future work is required to better define the pharmacokinetic and pharmacodynamic  
506 profiles of small molecule drugs in preclinical models of snakebite envenoming to inform the design  
507 of optimised pre-clinical dosing regimens applicable for use in more biologically realistic models of  
508 envenoming (e.g. “challenge then treat models”)<sup>26,34,36,46,51</sup>.

509 In sub-Saharan Africa, VICC is only known to be commonly caused by *Echis* spp. and *D. typus*, and the  
510 venoms of these snakes have been shown to converge on similar SVMP-rich venom composition  
511 profiles<sup>9</sup>, suggesting that *D. typus* venom may be amenable to neutralisation by previously identified  
512 inhibitors of *Echis* venoms. This study investigated the ability of repurposed small molecule inhibitors  
513 to effectively neutralise *D. typus* venom activity *in vitro* and *in vivo*, and identified the SVMP inhibiting  
514 drugs DMPS and marimastat as two lead compounds that provide a significant degree of preclinical  
515 protection against the lethal effects of *D. typus* venom. Previous studies have demonstrated that both  
516 DMPS and marimastat also provide preclinical efficacy against *E. ocellatus* envenoming<sup>26,36</sup>, and this  
517 study therefore expands the range of snake species that victims of envenoming could potentially  
518 benefit from receiving an early intervention (e.g. oral) small molecule therapeutic. These findings  
519 therefore provide a strong rationale for the future clinical evaluation of the efficacy of such small  
520 molecule drugs in all cases of diagnostically indicated VICC following snakebite envenoming in sub-  
521 Saharan Africa.

522

### 523 **Acknowledgements**

524 We thank the staff in the Biomedical Service Unit of the University of Liverpool for their support in the  
525 maintenance and care of the study mice.

526

527 **Funding**

528 This research was funded in whole, or in part, by the Wellcome Trust, grant numbers as detailed  
529 below. For the purpose of open access, the authors have applied a CC BY public copyright licence to  
530 any Author Accepted Manuscript version arising from this submission. R.H.C. acknowledges funding  
531 support from the Director's Catalyst Fund at LSTM [supported by Wellcome Institutional Strategic  
532 Support Fund 3 (204806/Z/16/Z) and LSTM Internal Funding]. N.R.C. acknowledges a UK Medical  
533 Research Council research grant (MR/S00016X/1) and a Sir Henry Dale Fellowship (200517/Z/16/Z)  
534 jointly funded by Wellcome and the Royal Society. N.R.C and J.K. acknowledge funding provided by a  
535 Wellcome project grant (221712/Z/20/Z). C.X. acknowledges funding support from the China  
536 Scholarship Council (CSC) fellowship (201706250035).

537

538 **References**

- 539 1. Halilu S, Iliyasu G, Hamza M, Chippaux JP, Kuznik A, Habib AG. Snakebite burden in Sub-  
540 Saharan Africa: estimates from 41 countries. *Toxicon*. 2019;159:1-4.  
541 doi:10.1016/j.toxicon.2018.12.002
- 542 2. Longbottom J, Shearer FM, Devine M, et al. Vulnerability to snakebite envenoming: a  
543 global mapping of hotspots. *The Lancet*. 2018;392(10148):673-684.  
544 doi:10.1016/S0140-6736(18)31224-8
- 545 3. Harrison RA, Casewell NR, Ainsworth SA, Lalloo DG. The time is now: a call for action to  
546 translate recent momentum on tackling tropical snakebite into sustained benefit for  
547 victims. *Trans R Soc Trop Med Hyg*. 2019;113(12):835-838. doi:10.1093/trstmh/try134
- 548 4. Berling I, Isbister GK. Hematologic Effects and Complications of Snake Envenoming.  
549 *Transfus Med Rev*. 2015;29(2):82-89. doi:10.1016/j.tmr.2014.09.005
- 550 5. Lakier JB, Fritz VU. Consumptive coagulopathy caused by a boomslang bite. *South Afr*  
551 *Med J Suid-Afr Tydskr Vir Geneesk*. 1969;43(34):1052-1055.
- 552 6. Matell G, Nyman D, Werner B, Wilhelmsson S. Consumption coagulopathy caused by a  
553 boomslang bite: A case report. *Thromb Res*. 1973;3(2):173-182. doi:10.1016/0049-  
554 3848(73)90067-4
- 555 7. Gomperts ED, Demetriou D. Laboratory studies and clinical features in a case of  
556 boomslang envenomation. *South Afr Med J Suid-Afr Tydskr Vir Geneesk*.  
557 1977;51(6):173-175.



- 558 8. Debono J, Dobson J, Casewell NR, et al. Coagulating Colubrids: Evolutionary,  
559 Pathophysiological and Biodiscovery Implications of Venom Variations between  
560 Boomslang (*Dispholidus typus*) and Twig Snake (*Thelotornis mossambicanus*). *Toxins*.  
561 2017;9(5):171. doi:10.3390/toxins9050171
- 562 9. Ainsworth S, Slagboom J, Alomran N, et al. The paraspecific neutralisation of snake  
563 venom induced coagulopathy by antivenoms. *Commun Biol*. 2018;1(1):1-14.  
564 doi:10.1038/s42003-018-0039-1
- 565 10. Debono J, Dashevsky D, Nouwens A, Fry BG. The sweet side of venom: Glycosylated  
566 prothrombin activating metalloproteases from *Dispholidus typus* (boomslang) and  
567 *Thelotornis mossambicanus* (twig snake). *Comp Biochem Physiol Part C Toxicol*  
568 *Pharmacol*. 2020;227:108625. doi:10.1016/j.cbpc.2019.108625
- 569 11. Pla D, Sanz L, Whiteley G, et al. What killed Karl Patterson Schmidt? Combined venom  
570 gland transcriptomic, venomomic and antivenomic analysis of the South African green  
571 tree snake (the boomslang), *Dispholidus typus*. *Biochim Biophys Acta Gen Subj*.  
572 2017;1861(4):814-823. doi:10.1016/j.bbagen.2017.01.020
- 573 12. Kamiguti AS, Theakston RDG, Sherman N, Fox JW. Mass spectrophotometric evidence  
574 for P-III/P-IV metalloproteinases in the venom of the Boomslang (*Dispholidus typus*).  
575 *Toxicon*. 2000;38(11):1613-1620. doi:10.1016/S0041-0101(00)00089-1
- 576 13. Krüger HJ, Lemke FG. Fatal Boomslang bite in the Northern Cape. *Afr J Emerg Med*.  
577 2019;9(1):53-55. doi:10.1016/j.afjem.2018.12.006
- 578 14. de Silva HA, Ryan NM, de Silva HJ. Adverse reactions to snake antivenom, and their  
579 prevention and treatment. *Br J Clin Pharmacol*. 2016;81(3):446-452.  
580 doi:10.1111/bcp.12739
- 581 15. Potet J, Smith J, McIver L. Reviewing evidence of the clinical effectiveness of  
582 commercially available antivenoms in sub-Saharan Africa identifies the need for a  
583 multi-centre, multi-antivenom clinical trial. *PLoS Negl Trop Dis*. 2019;13(6):e0007551.  
584 doi:10.1371/journal.pntd.0007551
- 585 16. Casewell NR, Cook DAN, Wagstaff SC, et al. Pre-Clinical Assays Predict Pan-African Echis  
586 Viper Efficacy for a Species-Specific Antivenom. *PLoS Negl Trop Dis*. 2010;4(10):e851.  
587 doi:10.1371/journal.pntd.0000851
- 588 17. World Health Organization. *Guidelines for the Prevention and Clinical Management of*  
589 *Snakebite in Africa*.; 2010. Accessed December 21, 2021.  
590 <https://www.who.int/publications-detail-redirect/9789290231684>
- 591 18. Bulfone TC, Samuel SP, Bickler PE, Lewin MR. Developing Small Molecule Therapeutics  
592 for the Initial and Adjunctive Treatment of Snakebite. *J Trop Med*. 2018;2018:1-10.  
593 doi:10.1155/2018/4320175



- 594 19. Williams HF, Layfield HJ, Vallance T, et al. The Urgent Need to Develop Novel Strategies  
595 for the Diagnosis and Treatment of Snakebites. *Toxins*. 2019;11(6).  
596 doi:10.3390/toxins11060363
- 597 20. Clare RH, Hall SR, Patel RN, Casewell NR. Small Molecule Drug Discovery for Neglected  
598 Tropical Snakebite. *Trends Pharmacol Sci*. 2021;42(5):340-353.  
599 doi:10.1016/j.tips.2021.02.005
- 600 21. Rucavado A, Escalante T, Franceschi A, et al. Inhibition of local hemorrhage and  
601 dermonecrosis induced by Bothrops asper snake venom: Effectiveness of early in situ  
602 administration of the peptidomimetic metalloproteinase inhibitor batimastat and the  
603 chelating agent CaNa EDTA. *Am J Trop Med Hyg* 63. Published online 2000.
- 604 22. Layfield HJ, Williams HF, Ravishankar D, et al. Repurposing Cancer Drugs Batimastat  
605 and Marimastat to Inhibit the Activity of a Group I Metalloprotease from the Venom of  
606 the Western Diamondback Rattlesnake, *Crotalus atrox*. *Toxins*. 2020;12(5):309.  
607 doi:10.3390/toxins12050309
- 608 23. Warrell, D.A., Davidson N, Greenwood B, et al. Poisoning by bites of the saw-scaled or  
609 carpet viper (*Echis carinatus*) in Nigeria. *Q J Med*. 1977;46:33-62.
- 610 24. Arias AS, Rucavado A, Gutiérrez JM. Peptidomimetic hydroxamate metalloproteinase  
611 inhibitors abrogate local and systemic toxicity induced by *Echis ocellatus* (saw-scaled)  
612 snake venom. *Toxicon Off J Int Soc Toxinology*. 2017;132:40-49.  
613 doi:10.1016/j.toxicon.2017.04.001
- 614 25. Xie C, Albulescu LO, Bittenbinder MA, et al. Neutralizing Effects of Small Molecule  
615 Inhibitors and Metal Chelators on Coagulopathic Viperinae Snake Venom Toxins.  
616 *Biomedicines*. 2020;8(9):297. doi:10.3390/biomedicines8090297
- 617 26. Albulescu LO, Hale MS, Ainsworth S, et al. Preclinical validation of a repurposed metal  
618 chelator as an early-intervention therapeutic for hemotoxic snakebite. *Sci Transl Med*.  
619 2020;12(542). doi:10.1126/scitranslmed.aay8314
- 620 27. Xie C, Slagboom J, Albulescu LO, et al. Neutralising effects of small molecule toxin  
621 inhibitors on nanofractionated coagulopathic Crotalinae snake venoms. *Acta Pharm Sin*  
622 *B*. 2020;10(10):1835-1845. doi:10.1016/j.apsb.2020.09.005
- 623 28. Howes JM, Theakston RDG, Laing GD. Neutralization of the haemorrhagic activities of  
624 viperine snake venoms and venom metalloproteinases using synthetic peptide  
625 inhibitors and chelators. *Toxicon Off J Int Soc Toxinology*. 2007;49(5):734-739.  
626 doi:10.1016/j.toxicon.2006.11.020
- 627 29. Slagboom J, Mladić M, Xie C, et al. High throughput screening and identification of  
628 coagulopathic snake venom proteins and peptides using nanofractionation and  
629 proteomics approaches. *PLoS Negl Trop Dis*. 2020;14(4):e0007802.  
630 doi:10.1371/journal.pntd.0007802

- 631 30. Xie C, Albulescu LO, Still KBM, et al. Varespladib Inhibits the Phospholipase A2 and  
632 Coagulopathic Activities of Venom Components from Hemotoxic Snakes. *Biomedicines*.  
633 2020;8(6):165. doi:10.3390/biomedicines8060165
- 634 31. Wang Y, Zhang J, Zhang D, Xiao H, Xiong S, Huang C. Exploration of the Inhibitory  
635 Potential of Varespladib for Snakebite Envenomation. *Molecules*. 2018;23(2):391.  
636 doi:10.3390/molecules23020391
- 637 32. Bryan-Quirós W, Fernández J, Gutiérrez JM, Lewin MR, Lomonte B. Neutralizing  
638 properties of LY315920 toward snake venom group I and II myotoxic phospholipases  
639 A2. *Toxicon*. 2019;157:1-7. doi:10.1016/j.toxicon.2018.11.292
- 640 33. Bittenbinder MA, Zdenek CN, Op den Brouw B, et al. Coagulotoxic Cobras: Clinical  
641 Implications of Strong Anticoagulant Actions of African Spitting Naja Venoms That Are  
642 Not Neutralised by Antivenom but Are by LY315920 (Varespladib). *Toxins*.  
643 2018;10(12):516. doi:10.3390/toxins10120516
- 644 34. Lewin MR, Gutiérrez JM, Samuel SP, et al. Delayed Oral LY333013 Rescues Mice from  
645 Highly Neurotoxic, Lethal Doses of Papuan Taipan (*Oxyuranus scutellatus*) Venom.  
646 *Toxins*. 2018;10(10):380. doi:10.3390/toxins10100380
- 647 35. Lewin MR, Gilliam LL, Gilliam J, et al. Delayed LY333013 (Oral) and LY315920  
648 (Intravenous) Reverse Severe Neurotoxicity and Rescue Juvenile Pigs from Lethal Doses  
649 of *Micrurus fulvius* (Eastern Coral Snake) Venom. *Toxins*. 2018;10(11).  
650 doi:10.3390/toxins10110479
- 651 36. Albulescu LO, Xie C, Ainsworth S, et al. A therapeutic combination of two small  
652 molecule toxin inhibitors provides broad preclinical efficacy against viper snakebite.  
653 *Nat Commun*. 2020;11(1):6094. doi:10.1038/s41467-020-19981-6
- 654 37. Still KBM, Nandlal RSS, Slagboom J, Somsen GW, Casewell NR, Kool J. Multipurpose HTS  
655 Coagulation Analysis: Assay Development and Assessment of Coagulopathic Snake  
656 Venoms. *Toxins*. 2017;9(12). doi:10.3390/toxins9120382
- 657 38. Zietek BM, Mayar M, Slagboom J, et al. Liquid chromatographic nanofractionation with  
658 parallel mass spectrometric detection for the screening of plasmin inhibitors and  
659 (metallo)proteinases in snake venoms. *Anal Bioanal Chem*. 2018;410(23):5751-5763.  
660 doi:10.1007/s00216-018-1253-x
- 661 39. World Health Organization. *WHO Guidelines for the Production, Control and Regulation*  
662 *of Snake Antivenom Immunoglobulins*. Geneva: World Health Organization.; 2018.  
663 [https://www.who.int/snakebites/resources/Snake\\_antivenom\\_immunoglobulins\\_WHO](https://www.who.int/snakebites/resources/Snake_antivenom_immunoglobulins_WHO_TRS1004_Annex5.pdf?ua=1)  
664 [\\_TRS1004\\_Annex5.pdf?ua=1](https://www.who.int/snakebites/resources/Snake_antivenom_immunoglobulins_WHO_TRS1004_Annex5.pdf?ua=1)
- 665 40. Kazandjian TD, Arrahman A, Still KBM, et al. Anticoagulant Activity of *Naja nigricollis*  
666 Venom Is Mediated by Phospholipase A2 Toxins and Inhibited by Varespladib. *Toxins*.  
667 2021;13(5):302. doi:10.3390/toxins13050302

- 668 41. Youngman NJ, Walker A, Naude A, Coster K, Sundman E, Fry BG. Varespladib  
669 (LY315920) neutralises phospholipase A2 mediated prothrombinase-inhibition induced  
670 by Bitis snake venoms. *Comp Biochem Physiol Part C Toxicol Pharmacol*.  
671 2020;236:108818. doi:10.1016/j.cbpc.2020.108818
- 672 42. Liu CC, Wu CJ, Hsiao YC, et al. Snake venom proteome of Protobothrops  
673 mucrosquamatus in Taiwan: Delaying venom-induced lethality in a rodent model by  
674 inhibition of phospholipase A2 activity with varespladib. *J Proteomics*.  
675 2021;234:104084. doi:10.1016/j.jprot.2020.104084
- 676 43. Alomran N, Alsolaiss J, Albulescu LO, et al. Pathology-specific experimental antivenoms  
677 for haemotoxic snakebite: The impact of immunogen diversity on the in vitro cross-  
678 reactivity and in vivo neutralisation of geographically diverse snake venoms. *PLoS Negl*  
679 *Trop Dis*. 2021;15(8):e0009659. doi:10.1371/journal.pntd.0009659
- 680 44. *Randomized, Double-Blinded, Placebo-Controlled Study to Evaluate the Safety,*  
681 *Tolerability, and Efficacy of a Multi-Dose Regimen of Oral Varespladib-Methyl in*  
682 *Subjects Bitten by Venomous Snakes*. clinicaltrials.gov; 2021. Accessed November 15,  
683 2021. <https://clinicaltrials.gov/ct2/show/NCT04996264>
- 684 45. Gutiérrez JM, Theakston RDG, Warrell DA. Confronting the Neglected Problem of Snake  
685 Bite Envenoming: The Need for a Global Partnership. *PLOS Med*. 2006;3(6):e150.  
686 doi:10.1371/journal.pmed.0030150
- 687 46. Gutiérrez JM, Solano G, Pla D, et al. Preclinical Evaluation of the Efficacy of Antivenoms  
688 for Snakebite Envenoming: State-of-the-Art and Challenges Ahead. *Toxins*.  
689 2017;9(5):163. doi:10.3390/toxins9050163
- 690 47. Kini RM, Sidhu SS, Laustsen AH. Biosynthetic Oligoclonal Antivenom (BOA) for  
691 Snakebite and Next-Generation Treatments for Snakebite Victims. *Toxins*.  
692 2018;10(12):534. doi:10.3390/toxins10120534
- 693 48. Lewin M, Samuel S, Merkel J, Bickler P. Varespladib (LY315920) Appears to Be a Potent,  
694 Broad-Spectrum, Inhibitor of Snake Venom Phospholipase A2 and a Possible Pre-  
695 Referral Treatment for Envenomation. *Toxins*. 2016;8(9):248.  
696 doi:10.3390/toxins8090248
- 697 49. Knudsen C, Ledsgaard L, Dehli RI, Ahmadi S, Sørensen CV, Laustsen AH. Engineering  
698 and design considerations for next-generation snakebite antivenoms. *Toxicon Off J Int*  
699 *Soc Toxicology*. 2019;167:67-75. doi:10.1016/j.toxicon.2019.06.005
- 700 50. Gutiérrez JM, Albulescu LO, Clare RH, et al. The Search for Natural and Synthetic  
701 Inhibitors That Would Complement Antivenoms as Therapeutics for Snakebite  
702 Envenoming. *Toxins*. 2021;13(7):451. doi:10.3390/toxins13070451
- 703 51. Knudsen C, Casewell NR, Lomonte B, Gutiérrez JM, Vaiyapuri S, Laustsen AH. Novel  
704 Snakebite Therapeutics Must Be Tested in Appropriate Rescue Models to Robustly  
705 Assess Their Preclinical Efficacy. *Toxins*. 2020;12(9):528. doi:10.3390/toxins12090528
